# Supplementary material for: Nitronyl nitroxide bridged 3d–4f hetero-tri-spin chains: synthesis strategy, crystal structure and magnetic properties
Source: Royal Society of Chemistry journal article supplement (doi:10.1039/c7ce01962a), 2017-12-14
Supplement: c7ce01962a1.pdf [file c7ce01962a1.pdf]

## Nitronyl nitroxide bridged 3d-4f hetero-tri-spin chains: synthesis strategy, crystal structure and magnetic properties

Mei Zhu<sup>\*a</sup>, Lingjie Jia<sup>a</sup>, Yang Li<sup>a</sup>, Yungai Li<sup>b</sup>, Li Zhang<sup>a</sup>, Wei Zhang<sup>a</sup>, Yaohong Lü<sup>a</sup>

<sup>a</sup>Department of Chemistry, Zhejiang Sci-Tech University, Hangzhou 310018, China

<sup>b</sup>Department of Chemistry, Key Laboratory of Advanced Energy Materials Chemistry, Tianjin Key Laboratory of Metal and Molecule-based Material Chemistry and Collaborative Innovation Center of Chemical Science and Engineering, Nankai University, Tianjin 300071, China

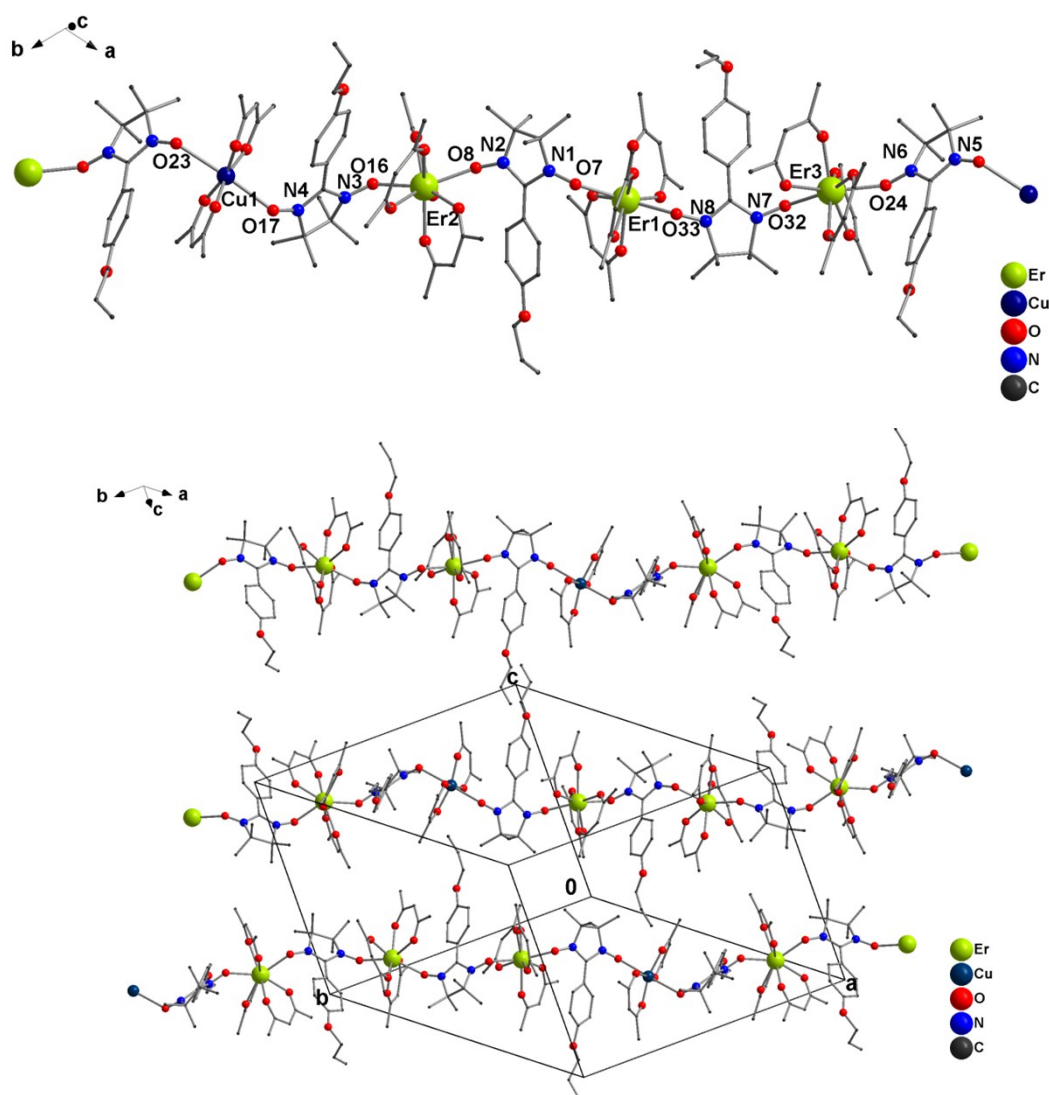

**Figure S1.** (*top*) Crystal structure for **4** (all hydrogen and fluorine atoms are omitted for clarity) and (*bottom*) crystal packing of the chains.

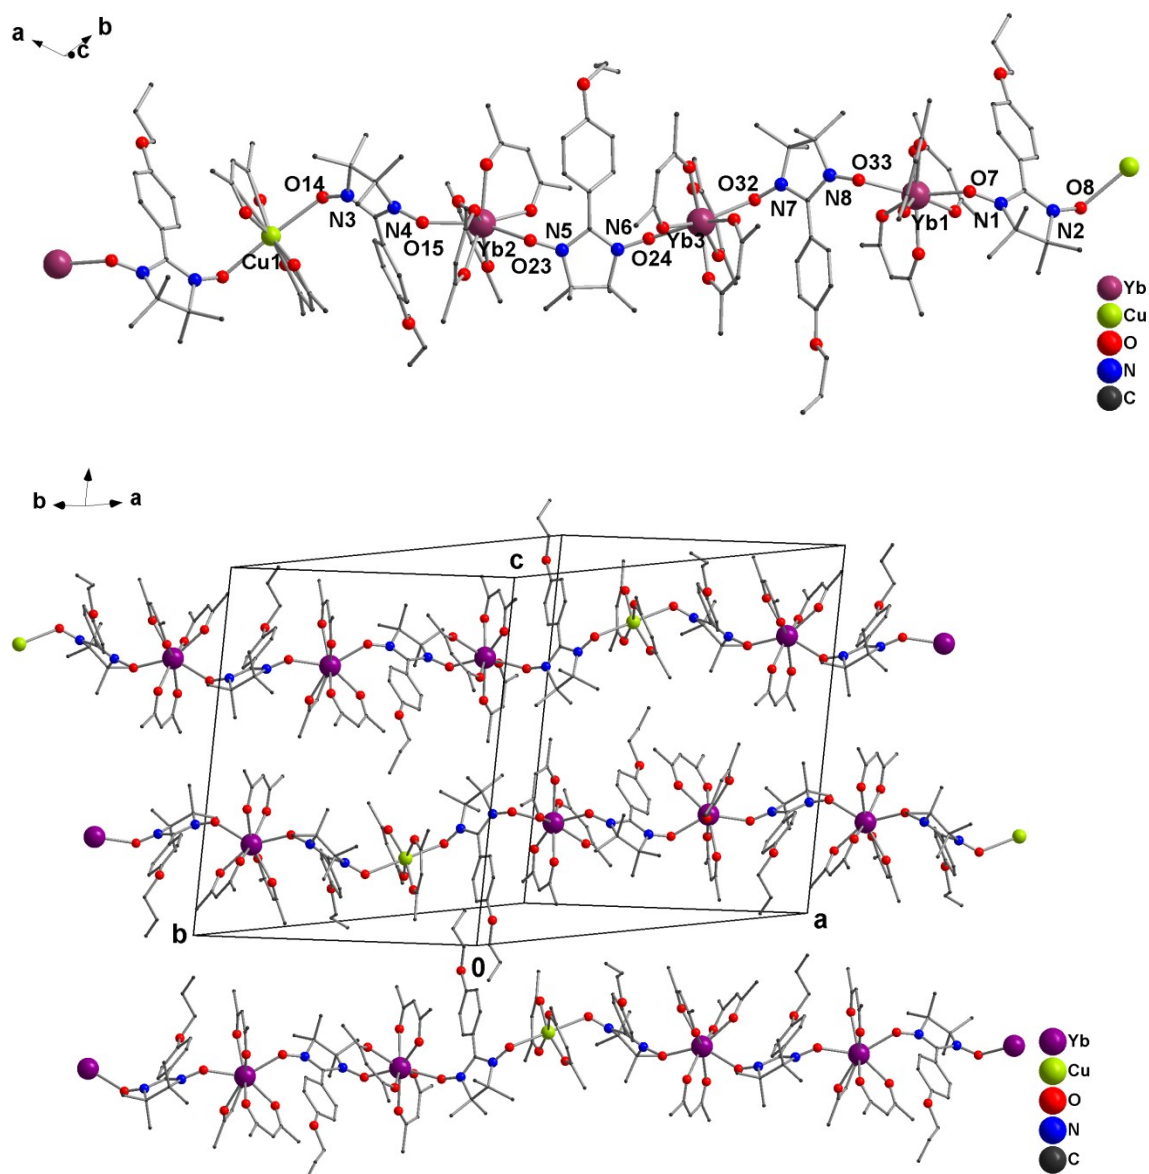

**Figure S2.** (*top*) Crystal structure for **5** (all hydrogen and fluorine atoms are omitted for clarity) and (*bottom*) crystal packing of the chains.

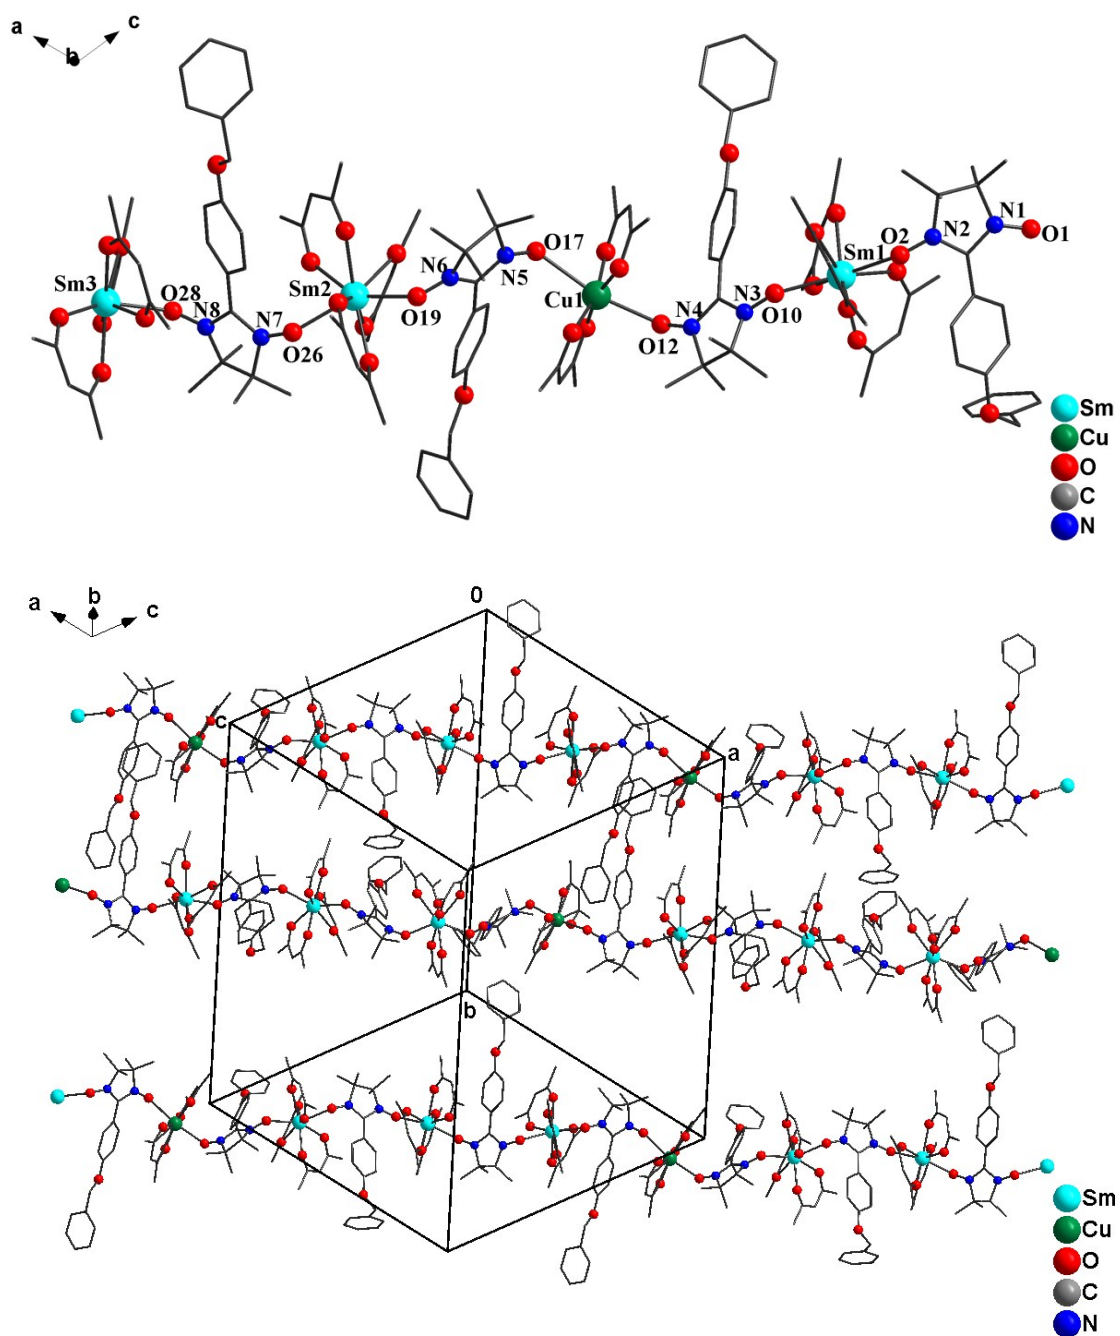

**Figure S3.** (*top*) Crystal structure for **7** (all hydrogen and fluorine atoms are omitted for clarity) and (*bottom*) crystal packing of the chains.

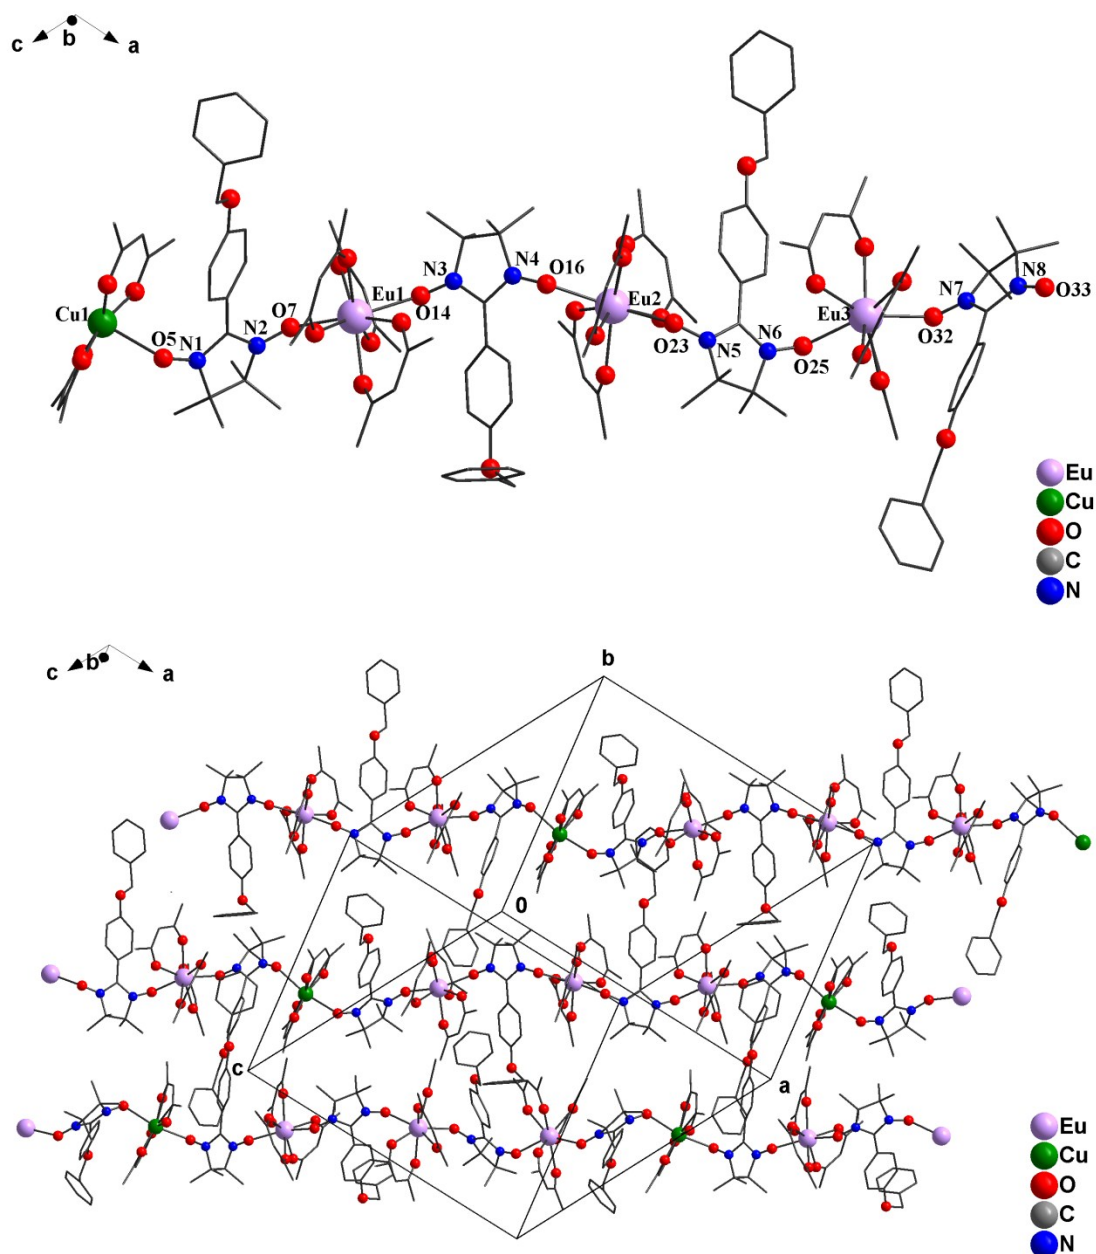

**Figure S4.** (top) Crystal structure for **8** (all hydrogen and fluorine atoms are omitted for clarity) and (bottom) crystal packing of the chains.

Table S1. Results of continuous shape measures analysis for the Ln coordination spheres

| Complex  | Ln  | SAPR-8 | TDD-8        | BTPR-8 |
|----------|-----|--------|--------------|--------|
| <b>1</b> | Dy1 | 1.286  | <b>0.332</b> | 1.894  |
|          | Dy2 | 1.229  | <b>0.382</b> | 1.938  |
| <b>2</b> | Dy1 | 1.089  | <b>0.772</b> | 1.364  |
|          | Dy2 | 1.128  | <b>0.558</b> | 1.784  |
|          | Dy3 | 1.955  | <b>0.359</b> | 2.164  |
| <b>3</b> | Ho1 | 0.972  | <b>0.845</b> | 1.378  |
|          | Ho2 | 0.989  | <b>0.632</b> | 1.768  |

|          |     |              |              |       |
|----------|-----|--------------|--------------|-------|
|          | Ho3 | 1.894        | <b>0.307</b> | 2.282 |
| <b>4</b> | Er1 | 0.952        | <b>0.663</b> | 1.809 |
|          | Er2 | 0.940        | <b>0.801</b> | 1.395 |
|          | Er3 | 1.898        | <b>0.304</b> | 2.373 |
| <b>5</b> | Yb1 | 0.964        | <b>0.666</b> | 1.819 |
|          | Yb2 | 1.900        | <b>0.299</b> | 2.437 |
|          | Yb3 | 0.968        | <b>0.802</b> | 1.340 |
| <b>6</b> | Pr1 | 1.453        | <b>0.686</b> | 2.183 |
|          | Pr2 | <b>0.801</b> | 0.976        | 1.682 |
|          | Pr3 | 0.927        | <b>0.748</b> | 1.823 |
| <b>7</b> | Sm1 | 1.411        | <b>0.558</b> | 2.117 |
|          | Sm2 | <b>0.797</b> | 0.860        | 1.663 |
|          | Sm3 | 0.993        | <b>0.619</b> | 1.808 |
| <b>8</b> | Eu1 | 1.353        | <b>0.553</b> | 2.070 |
|          | Eu2 | 1.025        | <b>0.572</b> | 1.777 |
|          | Eu3 | <b>0.801</b> | 0.836        | 1.671 |

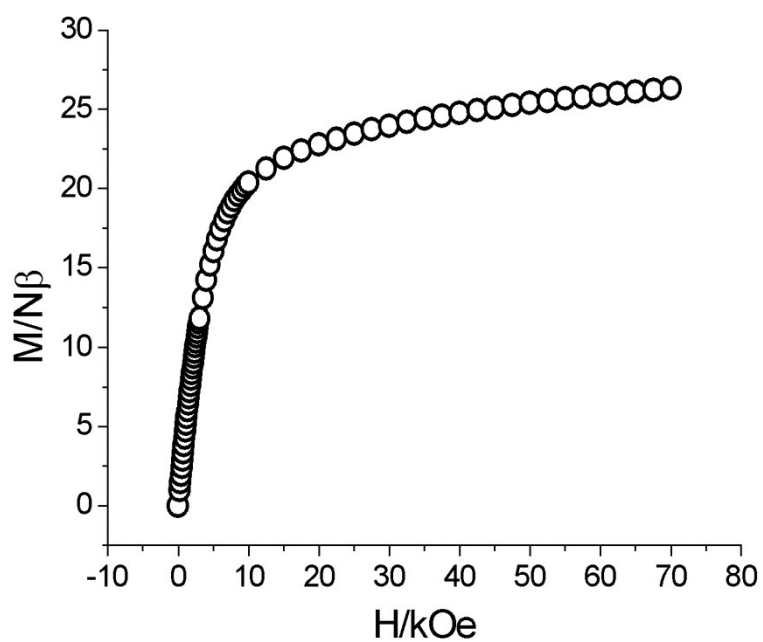

**Figure S5**  $M$  versus  $H$  plot at 2 K for complex **2**.

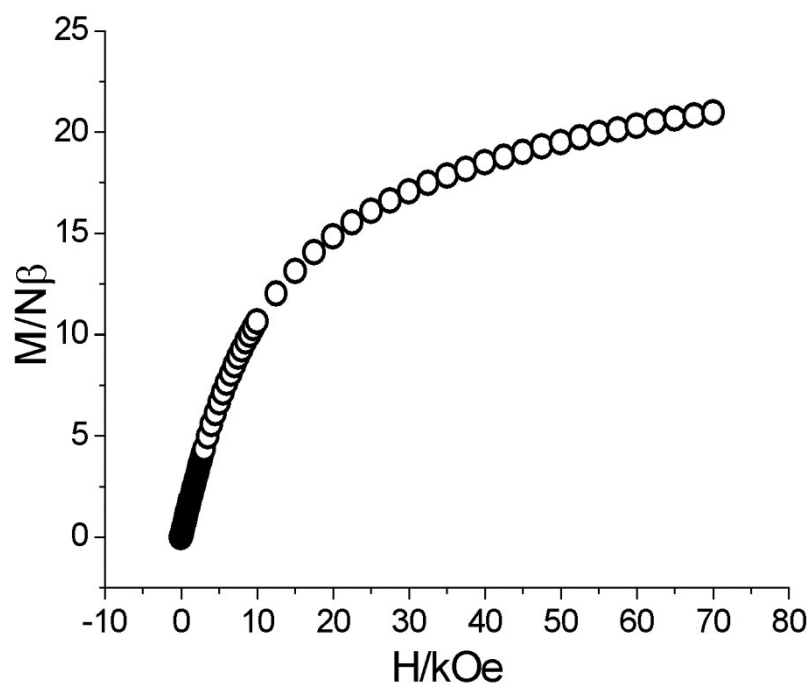

**Figure S6**  $M$  versus  $H$  plot at 2 K for complex 3.

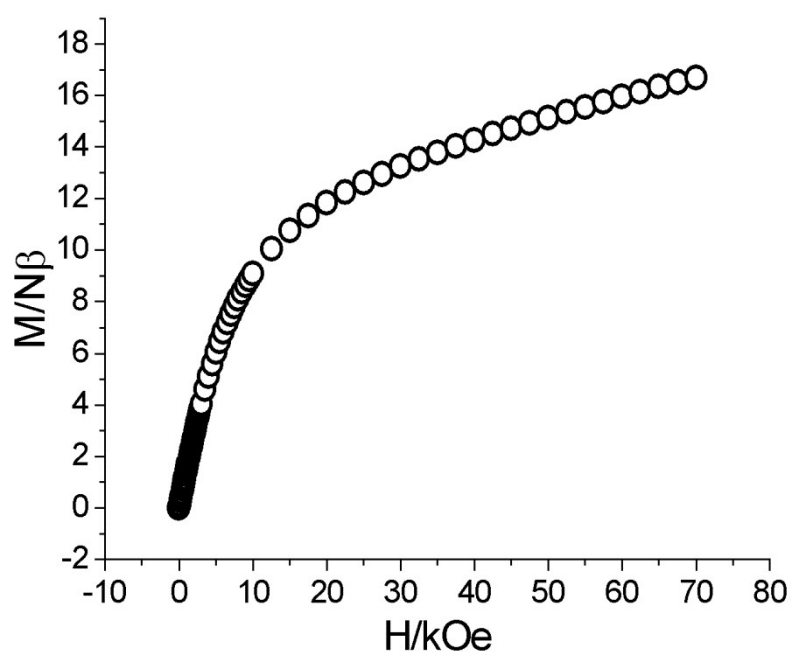

**Figure S7**  $M$  versus  $H$  plot at 2 K for complex 4.

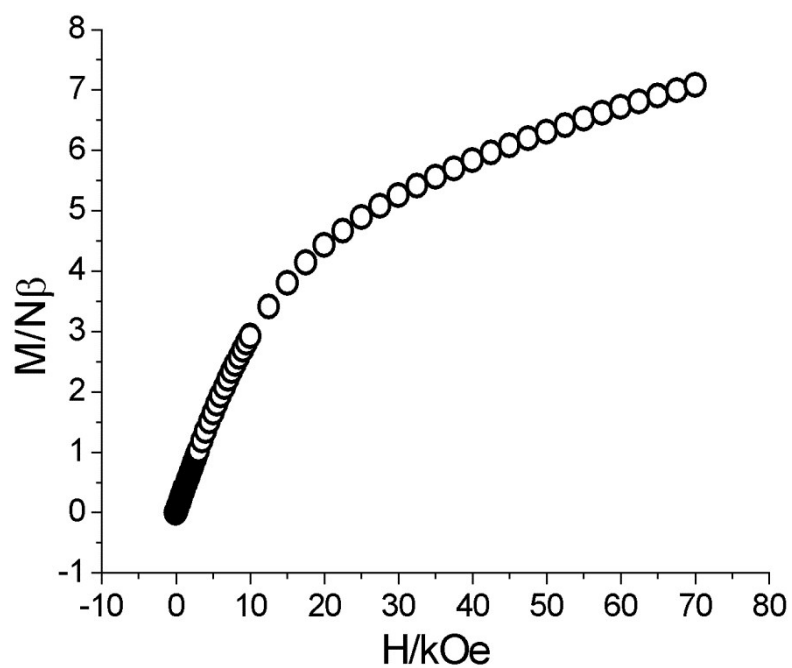

**Figure S8**  $M$  versus  $H$  plot at 2 K for complex **5**.

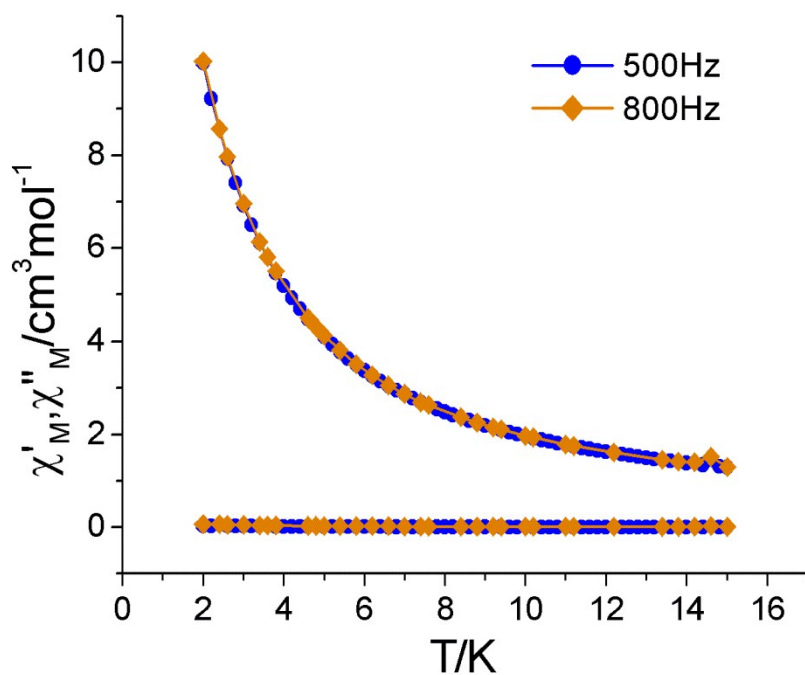

**Figure S9** Temperature dependence of the in-phase and out-of-phase components of the ac magnetic susceptibility in zero field with an oscillation 3 Oe at 500,800Hz for complex **2**.



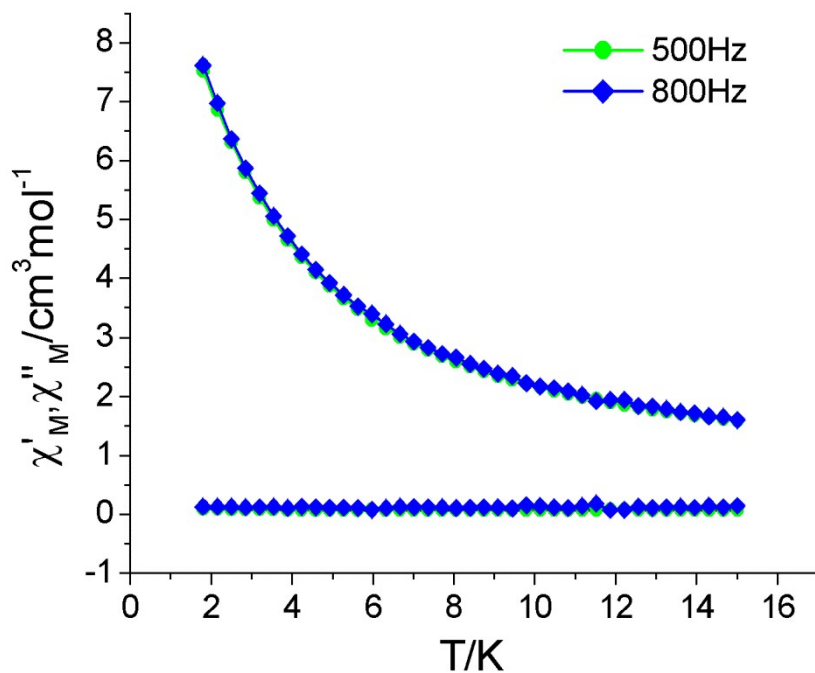

**Figure S10** Temperature dependence of the in-phase and out-of-phase components of the ac magnetic susceptibility in zero field with an oscillation 3 Oe at 500,800Hz for complex 4.

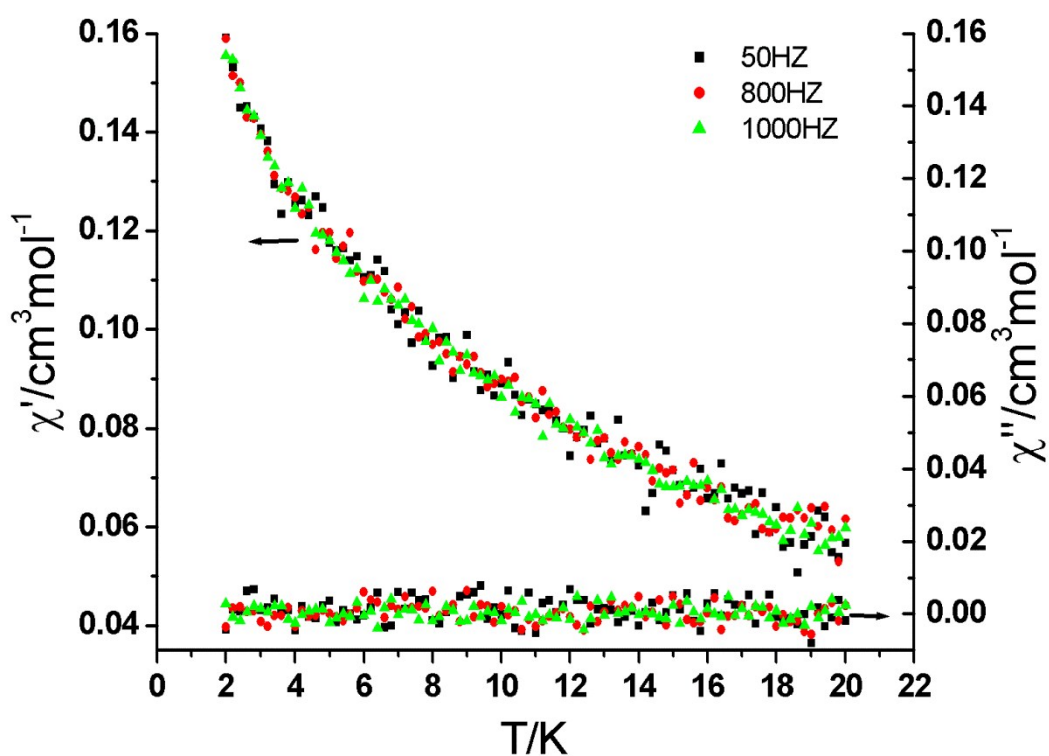

**Figure S9** Temperature dependence of the in-phase and out-of-phase components of the ac magnetic susceptibility in zero dc field with an oscillation 3.5 Oe for complex 7.
